# Supplementary material
Source: PubMed Central journal article supplement (PMC3887832)
Supplement: molcell-34-6-539-6-supplementary.pdf [file molcell-34-6-539-6-supplementary.pdf]

## Supporting Information

**Supplementary Table 1.** List of primers used in this study

**Supplementary Fig. 1.** Expression of *AtPrx1*, *AtPrx22*, *AtPrx39* and *AtPrx69* in *bri1-9* and *BRI1-GFP* plants compared with that of the wild type. ANOVA statistical analyses were performed and significant differences are indicated by P values (\*:  $P \leq 0.004$ , \*\*:  $P \leq 0.002$ ). The unpaired t-test was performed (\*\*\*: P value = 0.5).

**Supplementary Fig. 2.** Gross morphologies and  $H_2O_2$  concentrations of T-DNA insertional *AtPrx* mutants. (A) Phenotypes of T-DNA insertional *AtPrx* mutants compared with those of wild type. Pictures were taken of 4-week-old plants grown under long-day conditions. (B) Hydrogen peroxide concentrations were determined from 10-day-old seedlings.

**Supplementary Fig. 3.** DAB-staining pattern of the *BRI1-GFP* plants transformed with *AtPrx1*, *AtPrx22*, and *AtPrx69* under normal conditions.

**Supplementary Table 1. Primer Sequences**

| Primer Name         | Sequence (5' to 3')               | Use                                                                         |
|---------------------|-----------------------------------|-----------------------------------------------------------------------------|
| <i>AtPrx1 RT F</i>  | GGGGGTCACACCATTGGAATCTC           | Confirmation of null <i>AtPrx1</i> expression in the <i>atprx1</i> mutant   |
| <i>AtPrx1 RT R</i>  | GGAGGGAGAATGGCCTGAGTCTG           |                                                                             |
| <i>AtPrx22 RT F</i> | GACATGTCCGTGTTCTTTTCGAGCATTCA     | Confirmation of null <i>AtPrx22</i> expression in the <i>atprx22</i> mutant |
| <i>AtPrx22 RT R</i> | TATTAGTCGAAATTGTTCTCACGTGCG       |                                                                             |
| <i>AtPrx39 RT F</i> | CACCGGCGTTGGAGACCAAGATCC          | Confirmation of null <i>AtPrx39</i> expression in the <i>atprx39</i> mutant |
| <i>AtPrx39 RT R</i> | CTCCGATCCTCCGGCGAAGCGTTTG         |                                                                             |
| <i>AtPrx69 RT F</i> | CTGCTGGCTGCGGTCTAGTAAGGGG         | Confirmation of null <i>AtPrx69</i> expression in the <i>atprx69</i> mutant |
| <i>AtPrx69 RT R</i> | GGCTCGGGTCTCGGGATCCTTCC           |                                                                             |
| <i>Tubulin F</i>    | ACCATGAGCAGCTTTCTGTGCCTG          | Amplification of Arabidopsis <i>tubulin</i> for normalization               |
| <i>Tubulin R</i>    | CGCCGACTTCCTCATAGTCCTTC           |                                                                             |
| <i>AtrbohD F</i>    | GGAAGGATGGACTGGCATTGTG            | Monitoring the <i>AtrbohD</i> expression in response to cold                |
| <i>AtrbohD R</i>    | GTACGCTCAGTAATCGTCTCCG            |                                                                             |
| <i>AtrbohF F</i>    | GAACGATCGGCGACGGTGGTCATTTG        | Monitoring the <i>AtrbohF</i> expression in response to cold                |
| <i>AtrbohF R</i>    | CGAAATCGGAGCGATAGATGTAACCATT      |                                                                             |
| <i>AtPrx1 F</i>     | GGGGTACCATGGCGATCAAGAACATTCTCGC   | Amplification of full length <i>AtPrx1</i> for overexpression construct     |
| <i>AtPrx1 R</i>     | ACGCGTCGACTTAGTTAGGGAAGGCGCATCTC  |                                                                             |
| <i>AtPrx22 F</i>    | GGGGTACCATGGGGTTTTCTCCTTCATTTTC   | Amplification of full length <i>AtPrx22</i> for overexpression construct    |
| <i>AtPrx22 R</i>    | ACGCGTCGACTCAGATAGAACTCACAACACCAT |                                                                             |
| <i>AtPrx69 F</i>    | TCCCCCGGGATGGGTCGTGGTTACAATTTGC   | Amplification of full length <i>AtPrx69</i> for overexpression construct    |
| <i>AtPrx69 R</i>    | GCGTCGACTTAGTTGATGGCGGAACAAACC    |                                                                             |

RNA was purified from the seedlings grown for 10 days in normal conditions and then exposed to cold for 24 hours. The RNA samples were treated with RNase-free RQ1 DNase (Promega) and used for first-strand cDNA synthesis with the Superscript<sup>III</sup>-MMLV reverse transcriptase (Invitrogen) using oligo d(T<sub>15</sub>) as the primer. Second-strand synthesis was performed using the same aliquot of first-strand cDNA as the template. PCR conditions were as follows: pre-denaturation at 94°C for 4 min., denaturation at 94°C for 30 sec., primer-annealing at 52°C for 30 sec., elongation at 72°C for 30 sec. for 25 cycles or 28 cycles depending on the experiment, and post-elongation at 72°C for 7 min. The expression of each gene was normalized to  $\beta$ -*Tubulin*.

## Supplementary Fig.1 Kim *et al.*

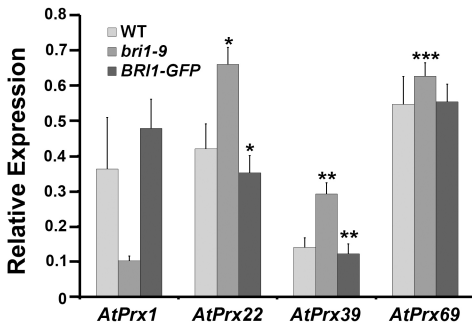

Supplementary Fig. 2 Kim *et al.*

A

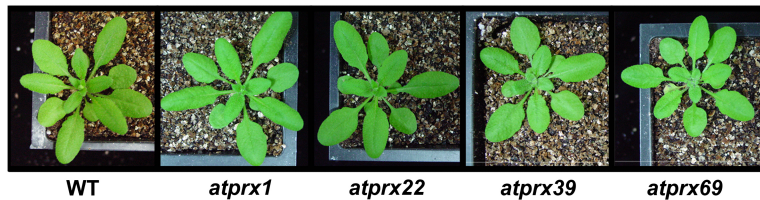

B

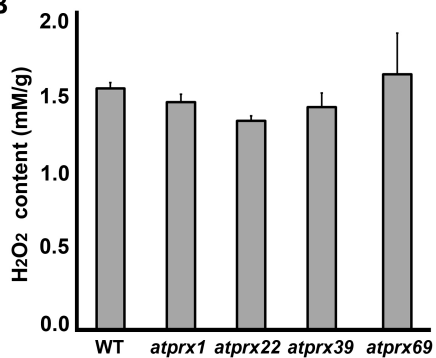

Supplementary Fig. 3 Kim *et al.*

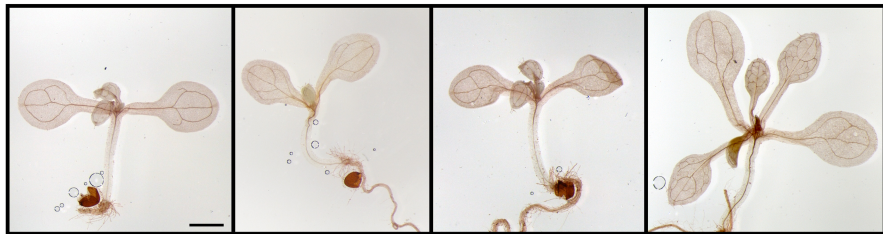

***BRI1-GFP***

***AtPrx1OE/  
BRI1-GFP***

***AtPrx22OE/  
BRI1-GFP***

***AtPrx69OE/  
BRI1-GFP***
